# Supplementary material for: Revisiting the Estimation of Dinosaur Growth Rates
Source: PubMed Central journal article supplement (PMC3864909; doi:10.1371/journal.pone.0081917), 2013-12-16
Supplement: pone.0081917.s002.pdf [file pone.0081917.s002.pdf]

*Massospondylus carinatus*

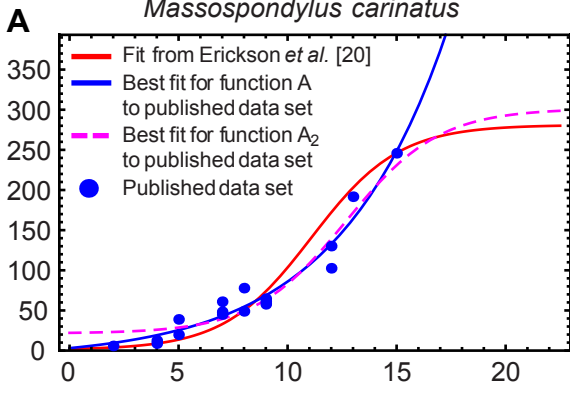

*Syntarsus rhodesiensis*

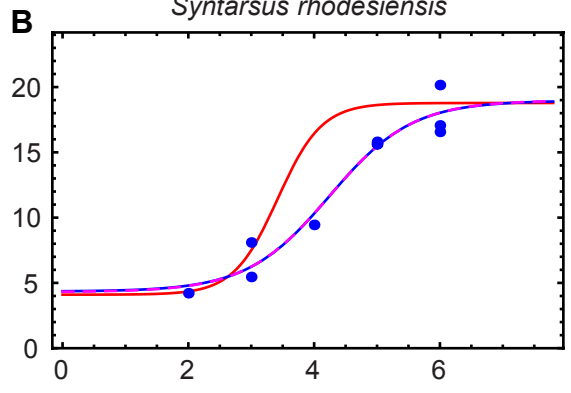

*Massospondylus carinatus 2*

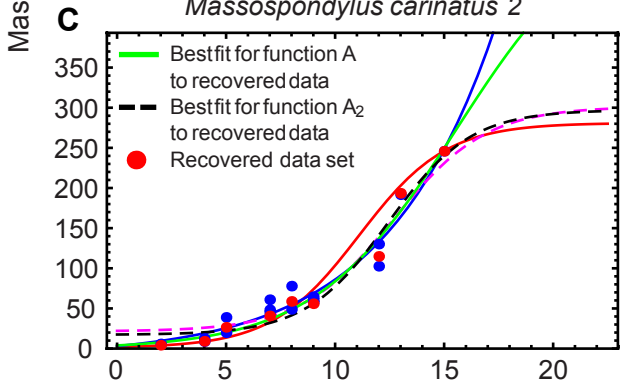

*Syntarsus rhodesiensis 2*

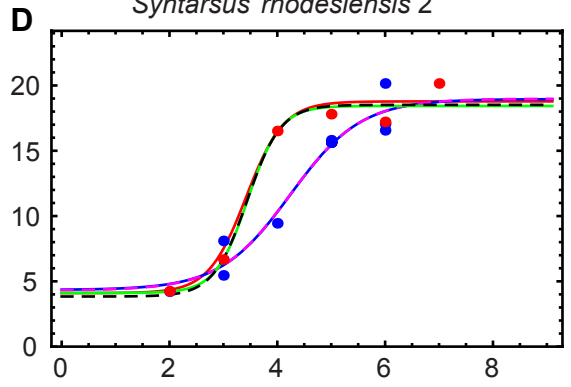

Age (yr)
