# Supplementary material for: Revisiting the Estimation of Dinosaur Growth Rates
Source: PubMed Central journal article supplement (PMC3864909; doi:10.1371/journal.pone.0081917), 2013-12-16
Supplement: pone.0081917.s004.pdf [file pone.0081917.s004.pdf]

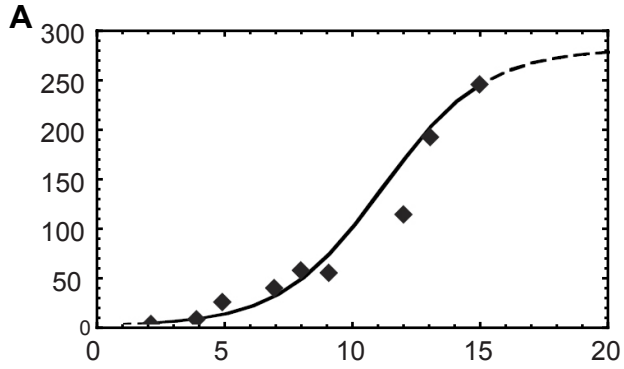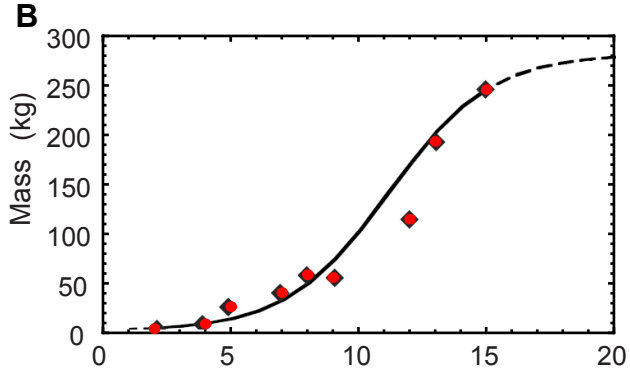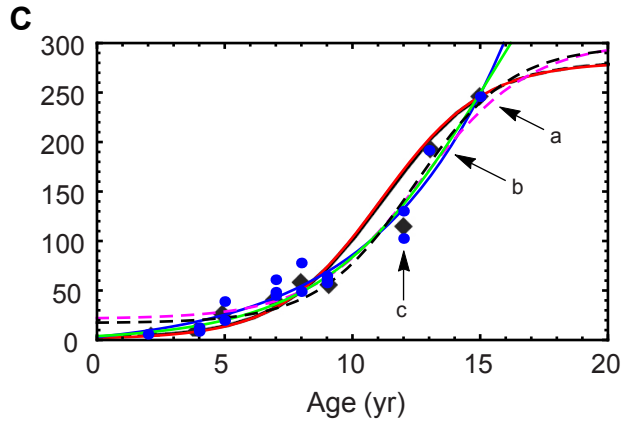

- Erickson *et al.* plot
- Recovered data
- ◆ Erickson *et al.* plot data
- Erickson *et al.* regression equation
- Best fit A to published data
- - Best fit  $A_2$  to published data
- Best fit A to recovered data
- - Best fit  $A_2$  to recovered data
- Original source data
