# Supplementary material for: Revisiting the Estimation of Dinosaur Growth Rates
Source: PubMed Central journal article supplement (PMC3864909; doi:10.1371/journal.pone.0081917), 2013-12-16
Supplement: pone.0081917.s006.pdf [file pone.0081917.s006.pdf]

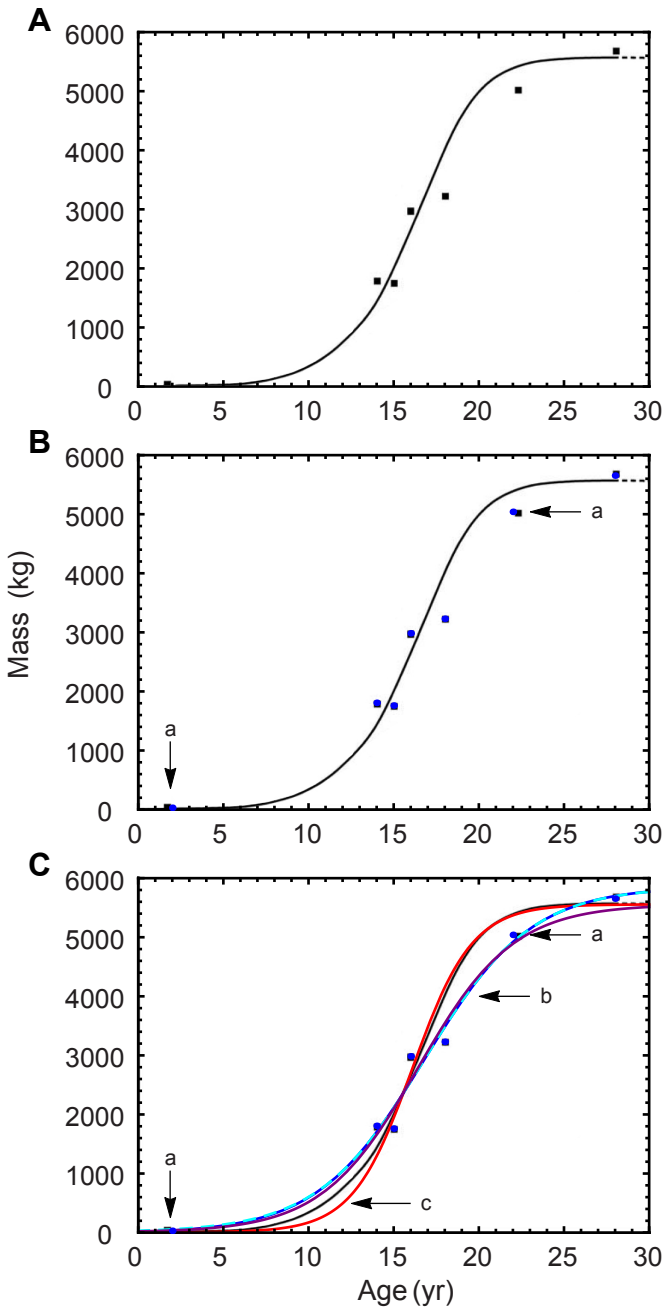

- Erickson *et al.* plot
- Erickson *et al.* plot data
- Erickson *et al.* regression equation
- Best fit A to published data
- Best fit B to published data
- Best fit B<sub>2</sub> to published data
- Published data
