# Supplementary material for: Revisiting the Estimation of Dinosaur Growth Rates
Source: PLoS One. 2013 Dec 16;8(12):e81917. doi: 10.1371/journal.pone.0081917 (PMC3864909; doi:10.1371/journal.pone.0081917)
Supplement: Table S2 — Best fits and strongly supported fits. The 62 asymptotic models and 15 increasing models used in this study are listed. For each model, counts are given of the number of age–bone dimension data sets for which the model provided the best fit () or strong support () when fit. Counts are shown separately for direct fits (which used age as the independent variable) and reverse fits (which used age as the dependent variable). Of the functions shown, 41 had strong statistical support when fit to at least one data set. (XLSX) [file pone.0081917.s014.xlsx]

## Sheet: S2
		Direct Fit Count		Reverse Fit Count
Model	Function Type	Best	Strong Support	Best	Strong Support
Beta-P 4	Sigmoid	0	0	0	0
Chapman-Richards 3	Sigmoid	0	0	0	0
Chapman-Richards 4	Sigmoid	0	0	0	0
Extreme Value 3a	Sigmoid	1	0	1	1
Extreme Value 3b	Sigmoid	1	0	1	1
Extreme Value 3z	Sigmoid	0	1	1	1
Extreme Value 4	Sigmoid	0	0	0	3
Gompertz 3a	Sigmoid	0	1	0	1
Gompertz 3b	Sigmoid	0	1	0	1
Gompertz 3z	Sigmoid	0	0	0	0
Gompertz 4a	Sigmoid	0	0	0	0
Gompertz 4b	Sigmoid	0	0	0	0
He Legendre 2	Sigmoid	0	0	0	0
He Legendre 3	Sigmoid	0	0	0	0
He Legendre 4	Sigmoid	0	0	0	0
Korf 3	Sigmoid	0	0	0	0
Korf 4	Sigmoid	0	0	0	0
Levakovic 2	Sigmoid	0	1	2	0
Levakovic 3a	Sigmoid	0	0	0	0
Levakovic 3b	Sigmoid	0	0	0	0
Levakovic 4a	Sigmoid	0	0	0	0
Levakovic 4b	Sigmoid	0	0	0	0
Logistic 2b	Sigmoid	0	3	0	2
Logistic 3	Sigmoid	0	0	0	1
Logistic 3z	Sigmoid	0	0	0	0
Logistic 4a	Sigmoid	0	0	0	1
Lomolino 2	Sigmoid	0	0	0	0
Lomolino 3	Sigmoid	0	0	0	0
Lomolino 4	Sigmoid	0	0	0	0
Morgan-Mercer-Flodin 2	Sigmoid	0	0	0	0
Morgan-Mercer-Flodin 3a	Sigmoid	0	0	0	0
Morgan-Mercer-Flodin 3b	Sigmoid	0	0	0	0
Morgan-Mercer-Flodin 4	Sigmoid	0	0	0	0
Morgan-Mercer-Flodin 4b	Sigmoid	0	0	0	0
Richards 4a	Sigmoid	0	0	0	0
Richards 4b	Sigmoid	0	0	1	2
Richards 4c	Sigmoid	0	0	0	0
Richards 4d	Sigmoid	0	0	1	2
Richards 4e	Sigmoid	0	0	2	1
Sloboda 4	Sigmoid	0	0	0	2
von Bertalanffy 2	Sigmoid	0	2	0	1
von Bertalanffy 3	Sigmoid	0	1	0	1
von Bertalanffy 3z	Sigmoid	0	0	0	0
von Bertalanffy 4	Sigmoid	0	0	0	0
Weibull 3a	Sigmoid	0	0	0	0
Weibull 3b	Sigmoid	0	0	0	0
Weibull 4a	Sigmoid	0	0	0	1
Weibull 4b	Sigmoid	0	0	0	0
Extreme Value 2	Attenuating	3	3	3	5
Gompertz 2	Attenuating	0	3	0	7
Logistic 2a	Attenuating	0	3	0	8
Michaelis Menten 2	Attenuating	2	5	0	9
Michaelis Menten 3	Attenuating	0	1	0	4
Monomolecular 3	Attenuating	0	1	0	4
Negative Exponential 2a	Attenuating	0	6	2	6
Negative Exponential 2b	Attenuating	0	6	2	6
Negative Exponential 3a	Attenuating	0	1	0	4
Negative Exponential 3b	Attenuating	0	1	0	4
Negative Exponential 4a	Attenuating	0	0	0	0
Rational 2z	Attenuating	2	5	0	9
Rational 3a	Attenuating	0	1	0	4
Rational 4	Attenuating	0	0	0	0
Linear 2	Increasing	4	9	4	10
Exponential 2	Increasing	1	7	0	7
Quadratic 2	Increasing	1	4	1	4
Cubic 2	Increasing	2	0	2	2
Power 2	Increasing	2	8	2	9
Power 3	Increasing	1	3	2	4
Persistence 3a	Increasing	9	1	7	2
Persistence 3b	Increasing	0	2	0	5
Quadratic 2b	Increasing	2	11	5	5
Quadratic 3	Increasing	0	2	0	3
Cubic 2b	Increasing	2	9	0	7
Power 3b	Increasing	0	3	0	5
Exponential 3	Increasing	1	2	0	0
Persistence 4a	Increasing	0	2	0	2
Persistence 4b	Increasing	0	0	0	0
