# Supplementary material for: Revisiting the Estimation of Dinosaur Growth Rates
Source: PLoS One. 2013 Dec 16;8(12):e81917. doi: 10.1371/journal.pone.0081917 (PMC3864909; doi:10.1371/journal.pone.0081917)
Supplement: Table S9 — Scaling of DME vs. Hutchinson et al. for five specimens of Tyrannosaurus rex . Femur length and mass estimates for minimal (Min), maximal (Max), average (Ave) and Hybrid scenarios, as calculated by Hutchinson et al. [41], are presented, along with the mass estimate derived by DME and the ratio between the DME estimate and the Hutchinson mass estimate. By construction, the DME mass is equal to the Hutchinson et al. mass for the largest specimen (“Sue”), so the ratios in that case are precisely 1.0. (XLSX) [file pone.0081917.s021.xlsx]

## Sheet: S9
Specimen	Jane	Carnegie	Stan	MOR	Sue
Femur Length	0.788	1.265	1.278	1.28	1.312
Min mass	639	7394	5934	5777	9502
DME min	2059	8517	8782	8824	9502
(DME min)/min	3.222	1.152	1.48	1.527	1
Max mass	1269	14560	10840	10770	18490
DME max	4006	16570	17090	17170	18490
(DME max)/max	3.157	1.138	1.577	1.594	1
Ave mass	954	9081	8385	8272	14000
DME ave	3032	12550	12940	13000	14000
(DME ave)/ave	3.179	1.381	1.543	1.571	1
Hybrid mass	954	9081	8385	8272	9502
DME hybrid	2059	8517	8782	8824	9502
(DME hybrid)/hybrid	2.158	0.9379	1.047	1.067	1
