# Supplementary material for: Revisiting the Estimation of Dinosaur Growth Rates
Source: PLoS One. 2013 Dec 16;8(12):e81917. doi: 10.1371/journal.pone.0081917 (PMC3864909; doi:10.1371/journal.pone.0081917)
Supplement: Table S10 — Least squares verification spreadsheet. The data from Table S8 is presented along with the original regression equations from [20], [24], [25], and the attempted replication regression equations. For each regression equation, the sum of square of errors is calculated to show that the attempted replication fits are better fits (smaller sum of square errors) than the original fits. See Text S1 for details. (XLSX) [file pone.0081917.s022.xlsx]

## Sheet: Tyrannosaurus rex A
Tyrannosaurus rex A
		Parameters (orig)		Parameters (best)
	a	5551		5875.1
	b	0.57		0.317801
	c	16.1		16.7814
	d	5		-16.4473
Tyrannosaurus rex		predicted	square error	predicted	square error
2	29.9	6.79393	533.89	36.6356	45.3684
14	1807	1292.88	264315	1701.21	11191.8
15	1761	1937.81	31261.3	2111.09	122564
16	2984	2701.42	79851.6	2558.21	181295
18	3230	4151.94	849968	3482.9	63959
22	5040	5370.2	109030	4918.83	14683.3
28	5654	5549.72	10874.6	5697.02	1851.12
			1.3453e+06		395545	TRUE

## Sheet: Tyrannosaurus rex B
Tyrannosaurus rex B
		Parameters (orig)		Parameters (best)
	a	5551		5848.91
	b	0.57		0.319759
	c	16.1		16.8009
	d	5		5
Tyrannosaurus rex		predicted	square error	predicted	square error
2	29.9	6.79393	533.89	56.0351	683.043
14	1807	1292.88	264315	1700.89	11258.8
15	1761	1937.81	31261.3	2109.93	121752
16	2984	2701.42	79851.6	2557	182329
18	3230	4151.94	849968	3483.32	64170.3
22	5040	5370.2	109030	4921.39	14067.2
28	5654	5549.72	10874.6	5695.44	1717.56
			1.3453e+06		395295	TRUE

## Sheet: Tyrannosaurus rex B2
Tyrannosaurus rex B2
		Parameters (orig)		Parameters (best)
	a	5551		5551
	b	0.57		0.356533
	c	16.1		16.4123
	d	5		5
Tyrannosaurus rex		predicted	square error	predicted	square error
2	29.9	6.79393	533.89	37.376	55.8908
14	1807	1292.88	264315	1655.45	22968
15	1761	1937.81	31261.3	2096.11	112302
16	2984	2701.42	79851.6	2576.86	165763
18	3230	4151.94	849968	3545.73	99682.7
22	5040	5370.2	109030	4889.74	22577.9
28	5654	5549.72	10874.6	5468.26	34500.4
			1.3453e+06		457794	TRUE

## Sheet: Gorosaurus libratus A
Gorosaurus libratus A
		Parameters (orig)		Parameters (best)
	a	1234		1.74887e+06
	b	0.38		0.0898559
	c	12.4		97.2782
	d	5		-304.437
Gorosaurus libratus		predicted	square error	predicted	square error
5	127	74.9421	2710.03	133.68	44.6271
7	229	145.491	6973.68	219.908	82.6699
14	607	803.996	38807.3	678.827	5159.17
14	747	803.996	3248.52	678.827	4647.51
18	1105	1107.7	7.2696	1103.75	1.56245
			49036.8		9890.91	TRUE

## Sheet: Gorosaurus libratus B
Gorosaurus libratus B
		Parameters (orig)		Parameters (best)
	a	1234		2132.15
	b	0.38		0.208813
	c	12.4		17.7017
	d	5		5
Gorosaurus libratus		predicted	square error	predicted	square error
5	127	74.9421	2710.03	145.399	338.522
7	229	145.491	6973.68	211.139	319.012
14	607	803.996	38807.3	678.415	5100.06
14	747	803.996	3248.52	678.415	4703.94
18	1105	1107.7	7.2696	1104.27	0.538583
			49036.8		10123.6	TRUE

## Sheet: Gorosaurus libratus B2
Gorosaurus libratus B2
		Parameters (orig)		Parameters (best)
	a	1234		1234
	b	0.38		0.299738
	c	12.4		12.9492
	d	5		5
Gorosaurus libratus		predicted	square error	predicted	square error
5	127	74.9421	2710.03	109.278	314.081
7	229	145.491	6973.68	182.584	2154.46
14	607	803.996	38807.3	718.373	12403.9
14	747	803.996	3248.52	718.373	819.527
18	1105	1107.7	7.2696	1016.44	7843.31
			49036.8		23221.2	TRUE

## Sheet: Albertosaurus sarcophagus A
Albertosaurus sarcophagus A
		Parameters (orig)		Parameters (best)
	a	1218		1185.28
	b	0.43		0.424825
	c	14.1		14.0558
	d	5		43.9422
Albertosaurus sarcophagus		predicted	square error	predicted	square error
2	50.3	11.6624	1492.86	50.9721	0.451784
15	762	730.392	999.037	753.872	66.0563
18	1013	1031.17	330.271	1042.33	860.045
22	1282	1183.55	9692.45	1190	8463.85
24	1142	1205.99	4094.51	1212.13	4917.94
			15116.3		14307.9	TRUE

## Sheet: Albertosaurus sarcophagus B
Albertosaurus sarcophagus B
		Parameters (orig)		Parameters (best)
	a	1218		1236.13
	b	0.43		0.381813
	c	14.1		13.8108
	d	5		5
Albertosaurus sarcophagus		predicted	square error	predicted	square error
2	50.3	11.6624	1492.86	18.454	1014.17
15	762	730.392	999.037	761.02	0.961124
18	1013	1031.17	330.271	1033.4	416.003
22	1282	1183.55	9692.45	1189.19	8613.11
24	1142	1205.99	4094.51	1216.37	5531.59
			15116.3		14561.7	TRUE

## Sheet: Albertosaurus sarcophagus B2
Albertosaurus sarcophagus B2
		Parameters (orig)		Parameters (best)
	a	1218		1218
	b	0.43		0.415891
	c	14.1		13.8407
	d	5		5
Albertosaurus sarcophagus		predicted	square error	predicted	square error
2	50.3	11.6624	1492.86	13.7871	1333.19
15	762	730.392	999.037	758.032	15.7455
18	1013	1031.17	330.271	1039.55	705.166
22	1282	1183.55	9692.45	1183.41	9719.76
24	1142	1205.99	4094.51	1205.45	4025.37
			15116.3		14466	TRUE

## Sheet: Massospondylus carinatus A
Massospondylus carinatus A
		Parameters (orig)		Parameters (best)
	a	280		4.52174e+06
	b	0.5		0.197691
	c	11.1		64.4199
	d	1		-10.2511
Massospondylus carinatus		predicted	square error	predicted	square error
2	5.79685	3.92788	3.49305	9.52606	13.9071
4	8.73984	8.81832	0.00615936	19.117	107.685
4	12.427	8.81832	13.0227	19.117	44.7559
5	19.7028	13.6609	36.5045	25.5364	34.0312
5	38.8566	13.6609	634.823	25.5364	177.427
7	44.9172	32.9347	143.582	42.8915	4.10383
7	48.2546	32.9347	234.701	42.8915	28.7635
7	60.8706	32.9347	780.416	42.8915	323.25
8	48.8735	50.0242	1.32402	54.5075	31.7421
8	77.8017	50.0242	771.593	54.5075	542.62
9	57.6585	73.583	253.589	68.6626	121.089
9	60.8706	73.583	161.606	68.6626	60.7154
9	64.6073	73.583	80.5645	68.6626	16.4459
12	102.532	171.979	4822.86	132.545	900.742
12	130.162	171.979	1748.7	132.545	5.67879
13	191.632	202.912	127.242	163.756	777.048
15	245.793	246.125	0.110195	248.137	5.49383
			9810.64		3181.59	TRUE

[truncated: 71 more sheets: Massospondylus carinatus A2, Massospondylus carinatus 2 A, Massospondylus carinatus 2 A2, Syntarsus rhodesiensis A, Syntarsus rhodesiensis A2, Syntarsus rhodesiensis 2 A, Syntarsus rhodesiensis 2 A2, Psittacosaurus mongoliensis A, Psittacosaurus mongoliensis C, Psittacosaurus mongoliensis A2, Psittacosaurus mongoliensis C2, Psittacosaurus lujiatunensis 1A, Psittacosaurus lujiatunensis 1D, Psittacosaurus lujiatunensis 1E, Psittacosaurus lujiatunensis 1F, Psittacosaurus lujiatunensis 1G, P. lujiatunensis 1A2, P. lujiatunensis 1D2, P. lujiatunensis 1E2, P. lujiatunensis 1F2 …]
